# Supplementary material
Source: Springer Nature journal article supplement (https://www.springermedizin.de/resource/supplementary/12881_2003_49_MOESM3_ESM.pdf/9452310)

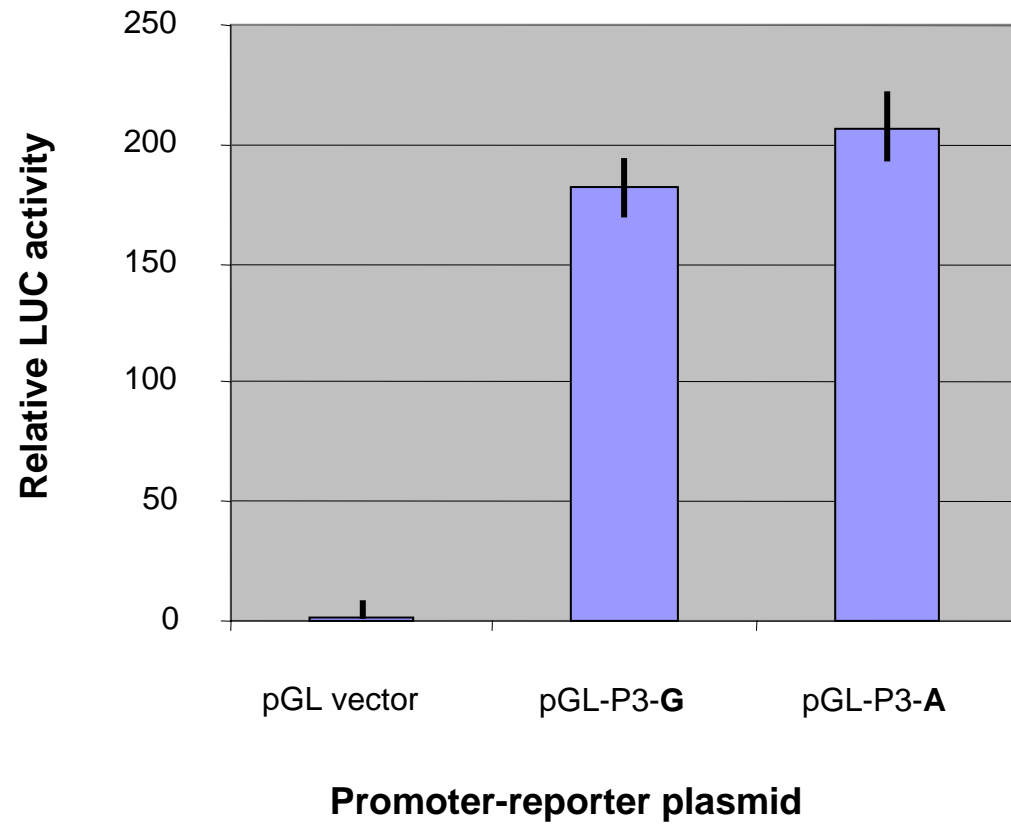

Supplement: MOESM3 [file 9452310]
